# Supplementary material for: Mammalian Arginase Inhibitory Activity of Methanolic Extracts and Isolated Compounds from Cyperus Species
Source: MDPI journal article supplement (doi:10.3390/molecules26061694), 2021-03-18
Supplement: s1 [file s1]

---

SUPPORTING INFORMATIONS

**Mammalian Arginase Inhibitory Activity and Vasorelaxant Positive Effect on Thoracic Aorta Rings from Rats of Methanolic Extracts from *Cyperus* Species.**

**Kamel Arraki,<sup>1</sup> Perle Totoson,<sup>1</sup> Alain Decendit,<sup>2</sup> Andy Zedet,<sup>1</sup> Justine Maroilley,<sup>1</sup> Alain Badoc,<sup>2</sup> Céline Demougeot,<sup>1</sup> and Corine Girard<sup>1,\*</sup>**

<sup>1</sup> PEPITE EA 4267, FHU INCREASE, University of Bourgogne Franche-Comté, 25000 Besançon, France 1

<sup>2</sup> MIB-UR Oenologie, EA 4577, USC 1366 INRA, University of Bordeaux, ISVV, 33882 Villenave d'Ornon, France

\* Correspondence: corine.girard@univ-fcomte.fr

---

| N° | Content                                                                           | Page |
|----|-----------------------------------------------------------------------------------|------|
| 1  | <b>Figure S1.</b> $^1\text{H}$ NMR spectrum of compound <b>1</b>                  | 1    |
| 1  | <b>Figure S2.</b> $^{13}\text{C}$ NMR spectrum of compound <b>1</b>               | 1    |
| 1  | <b>Figure S3.</b> HSQC spectrum of compound <b>1</b>                              | 2    |
| 1  | <b>Figure S4.</b> HMBC spectrum of compound <b>1</b>                              | 2    |
| 1  | <b>Figure S5.</b> $^1\text{H}$ - $^1\text{H}$ COSY spectrum of compound <b>1</b>  | 3    |
| 1  | <b>Figure S6.</b> NOESY spectrum of compound <b>1</b>                             | 3    |
| 2  | <b>Figure S7.</b> $^1\text{H}$ NMR spectrum of compound <b>2</b>                  | 4    |
| 2  | <b>Figure S8.</b> $^{13}\text{C}$ NMR spectrum of compound <b>2</b>               | 4    |
| 2  | <b>Figure S9.</b> HSQC spectrum of compound <b>2</b>                              | 5    |
| 2  | <b>Figure S10.</b> HMBC spectrum of compound <b>2</b>                             | 5    |
| 2  | <b>Figure S11.</b> $^1\text{H}$ - $^1\text{H}$ COSY spectrum of compound <b>2</b> | 6    |
| 2  | <b>Figure S12.</b> NOESY spectrum of compound <b>2</b>                            | 6    |

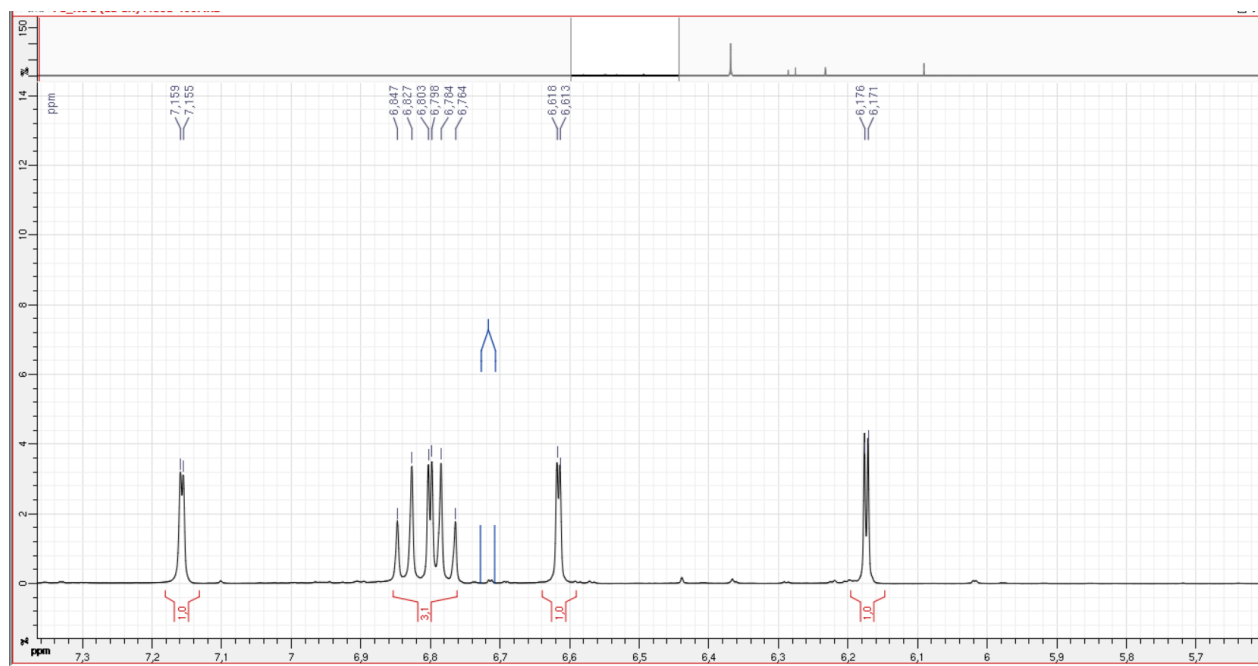

Figure S1.  $^1\text{H}$  NMR spectrum of compound 1

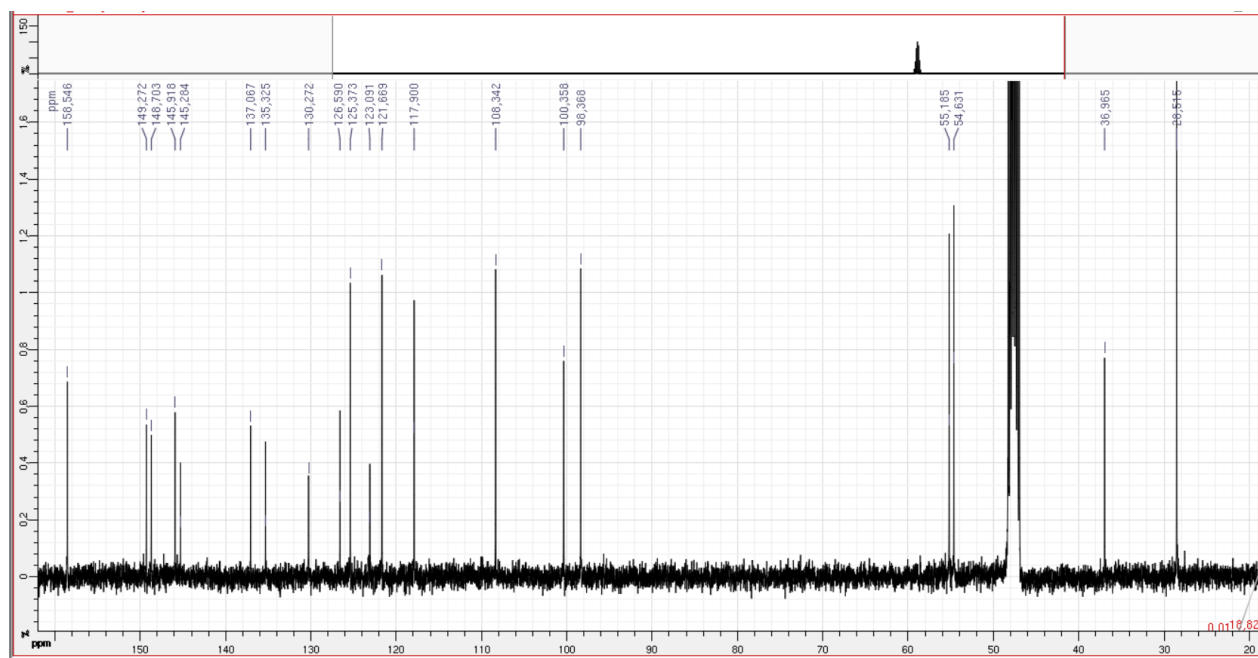

Figure S2.  $^{13}\text{C}$  NMR spectrum of compound 1

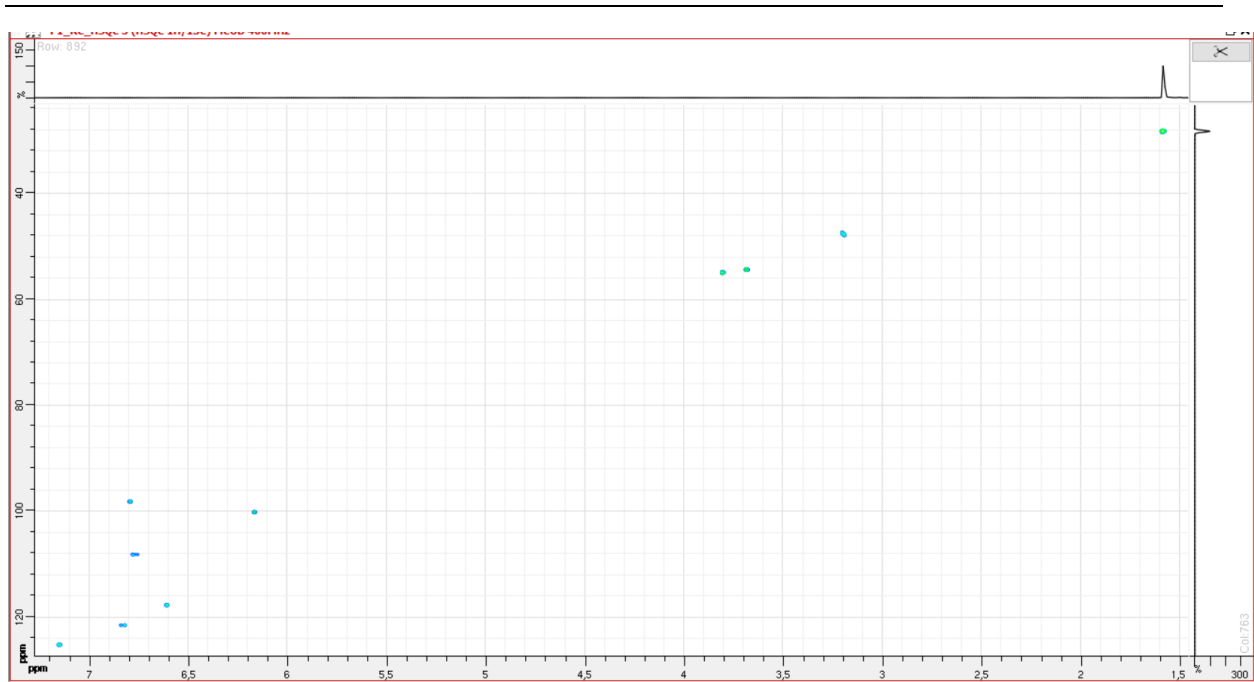

**Figure S3.** HSQC spectrum of compound **1**

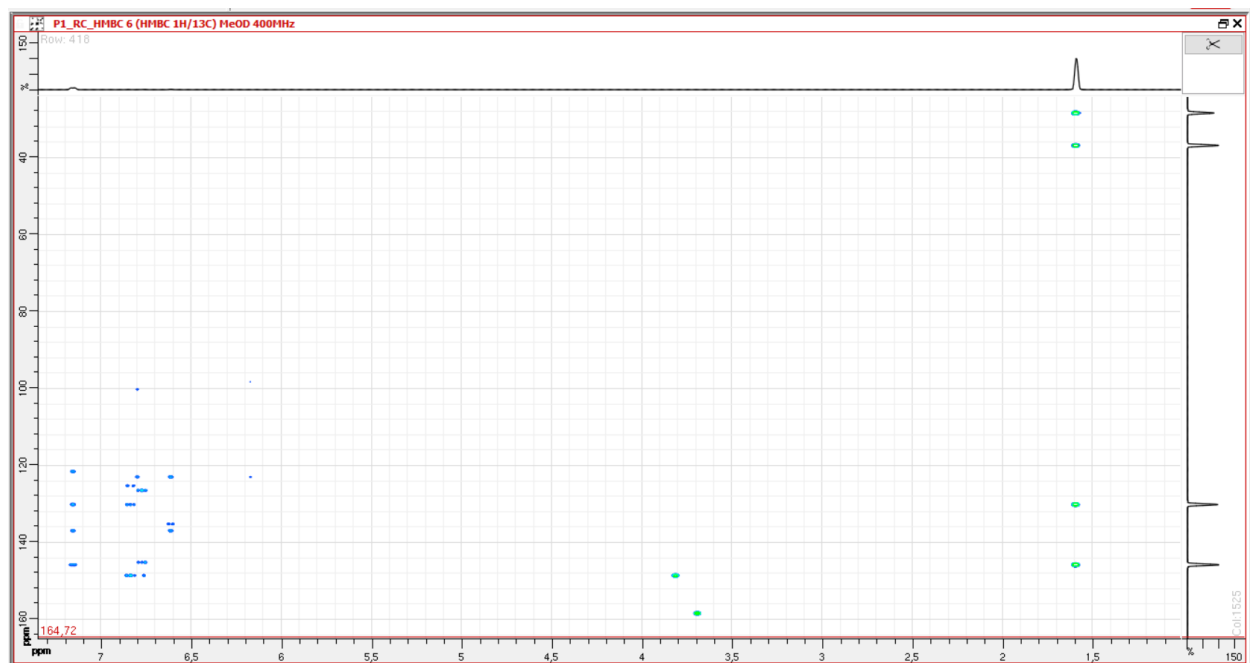

**Figure S4.** HMBC spectrum of compound **1**

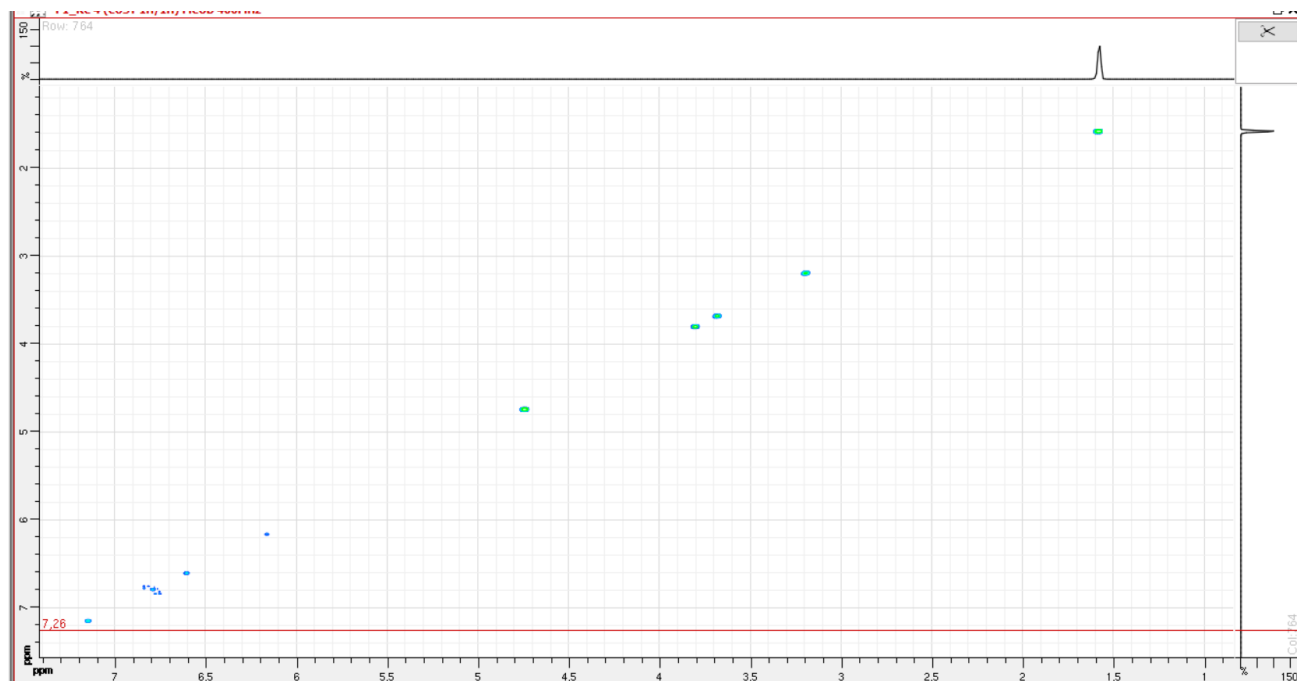

**Figure S5.**  $^1\text{H}$ - $^1\text{H}$  COSY spectrum of compound **1**

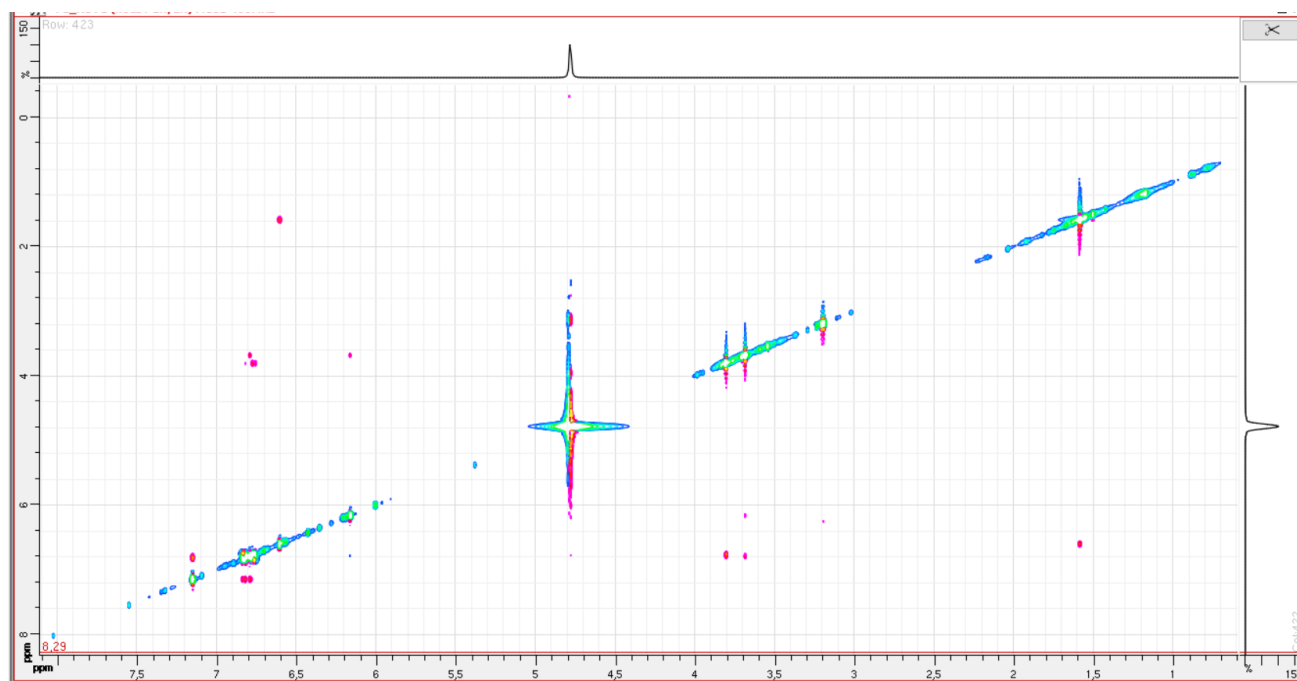

**Figure S6.** NOESY spectrum of compound **1**

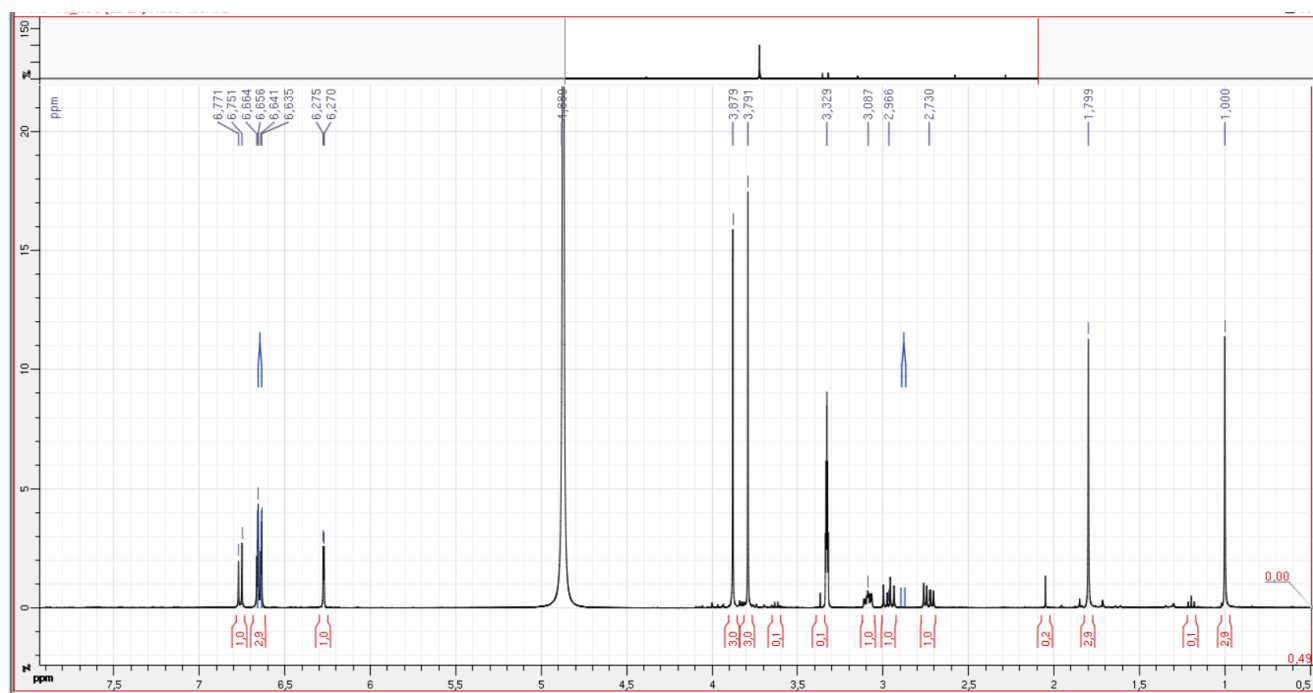

**Figure S7.  $^1\text{H}$  NMR spectrum of compound 2**

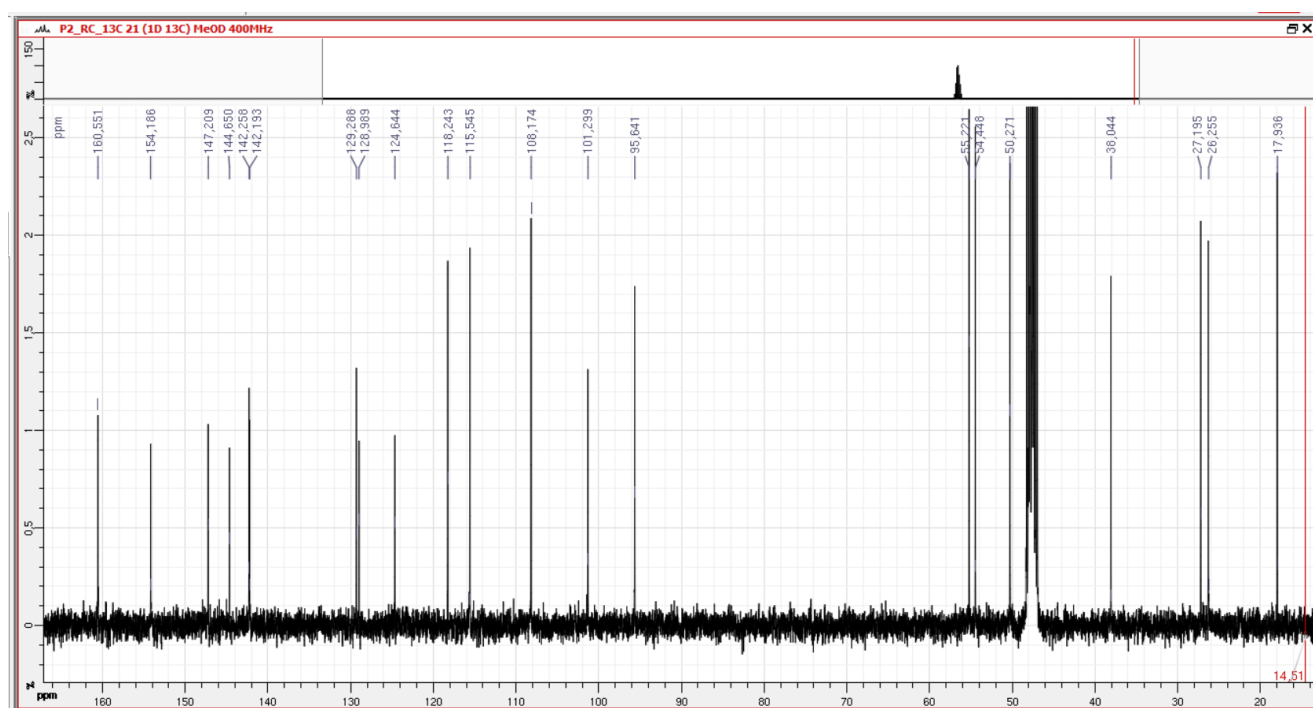

**Figure S8.  $^{13}\text{C}$  NMR spectrum of compound 2**

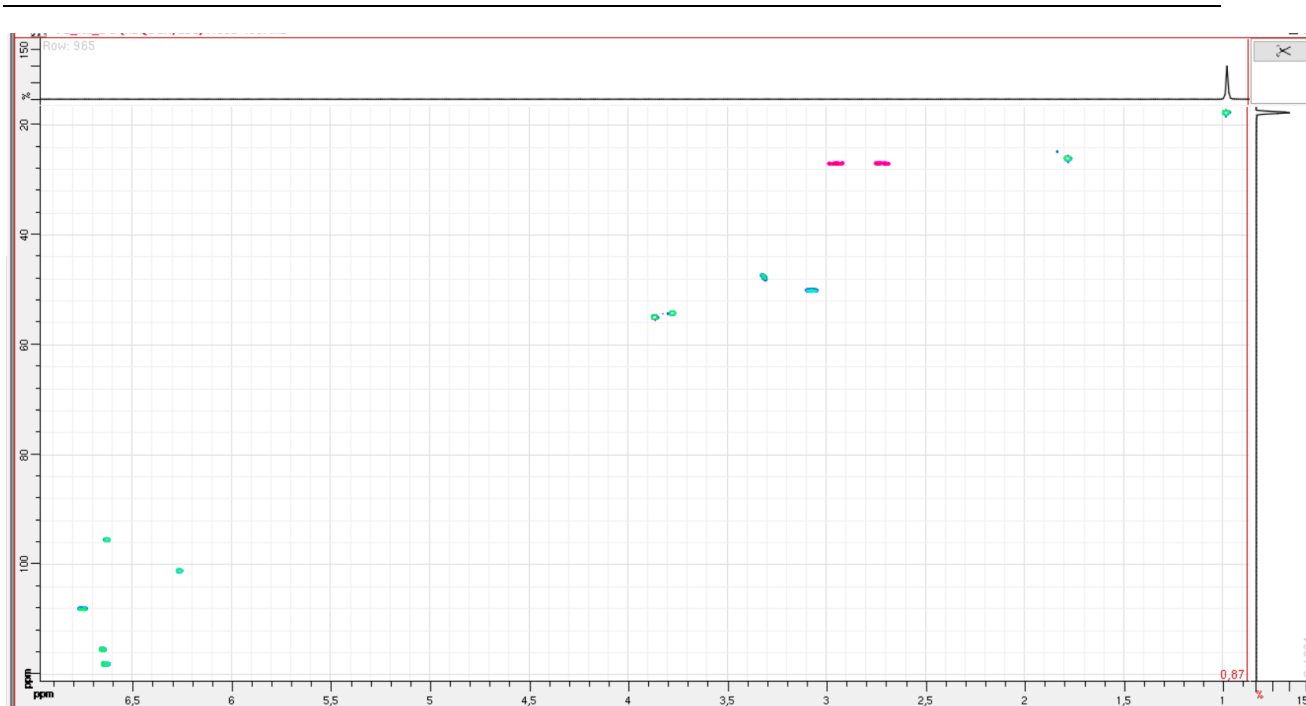

**Figure S9.** HSQC spectrum of compound **2**

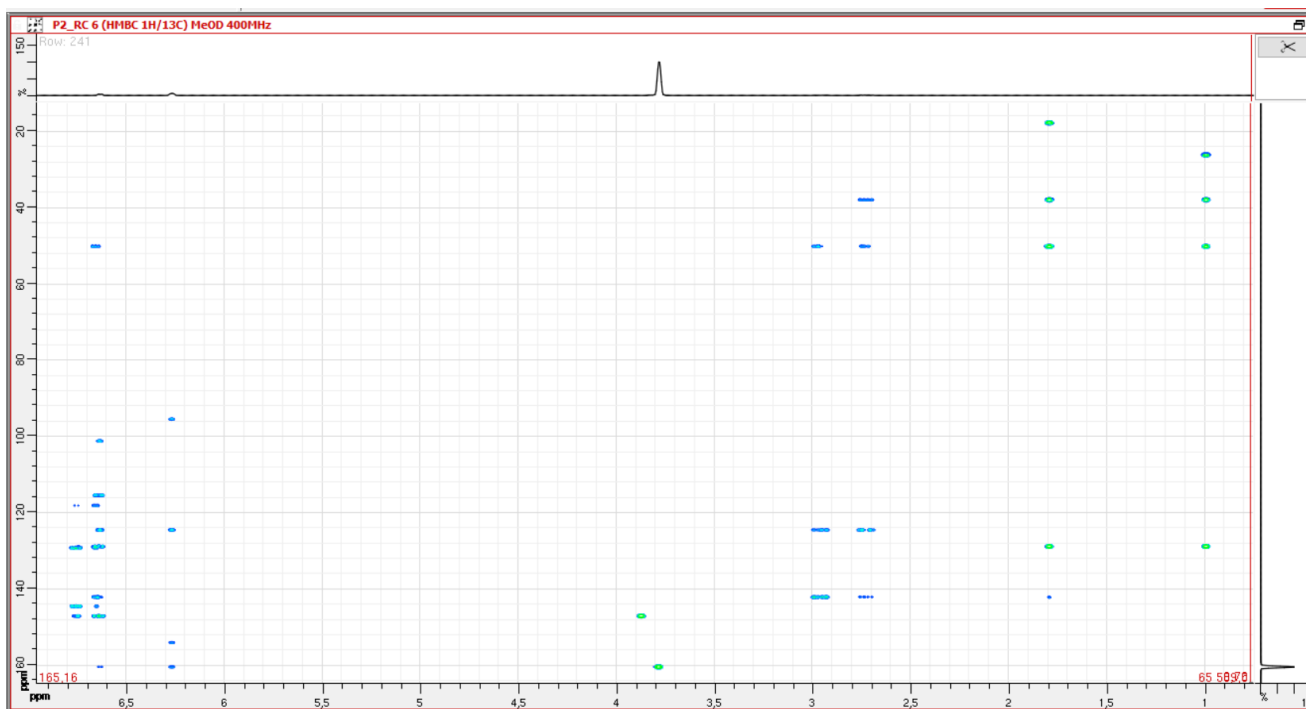

**Figure S10.** HMBC spectrum of compound **2**

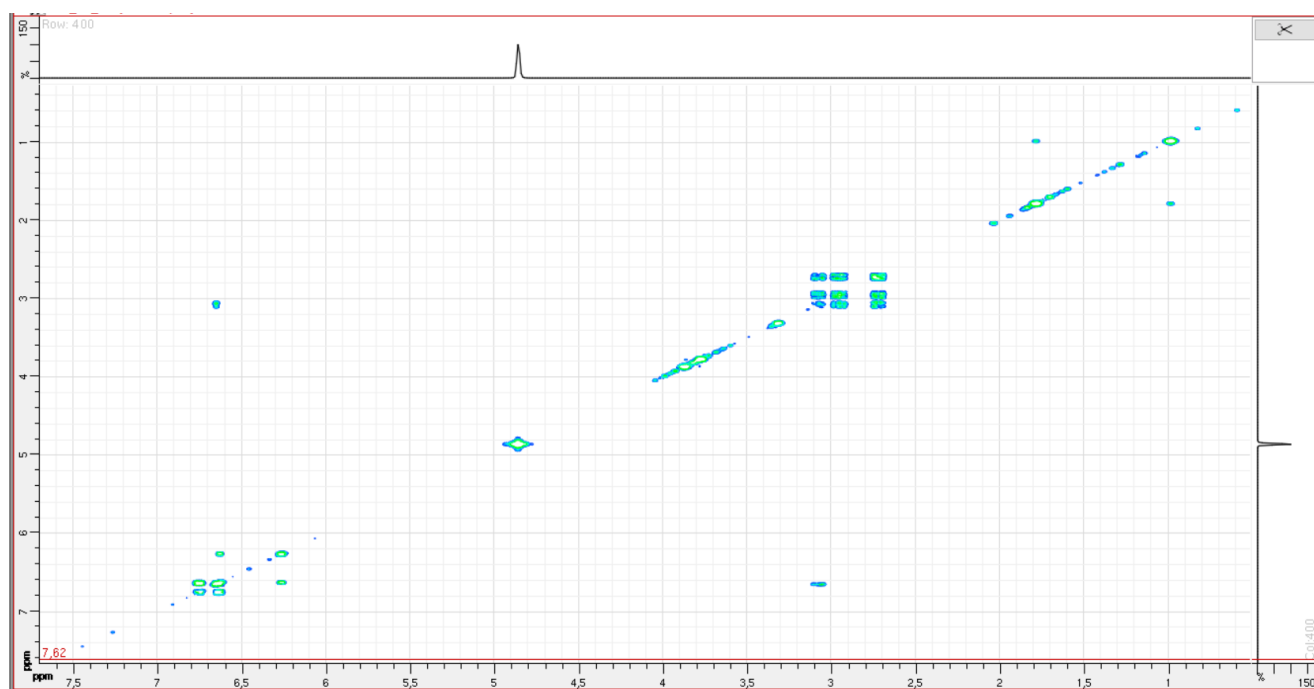

**Figure S11.**  $^1\text{H}$ - $^1\text{H}$  COSY spectrum of compound **2**

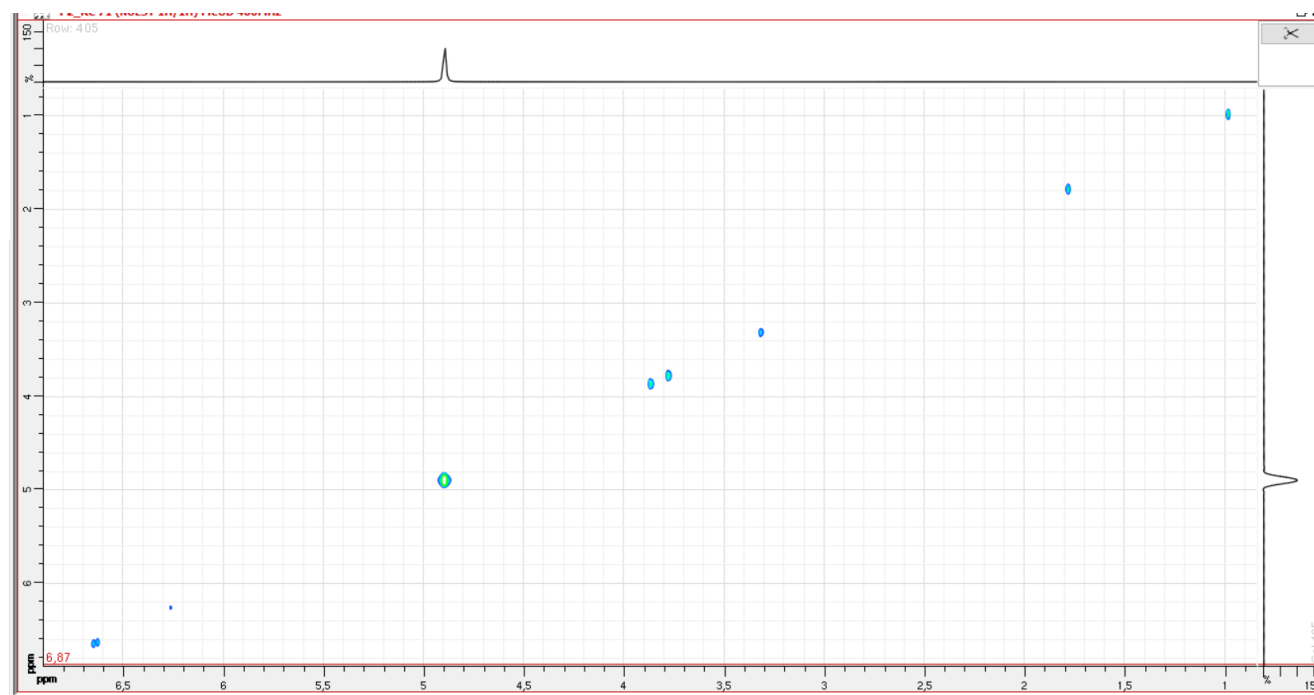

**Figure S12.** NOESY spectrum of compound **2**
